# Supplementary material for: Abundance and Seasonal Migration Patterns of Green Lacewings (Neuroptera: Chrysopidae) across the Bohai Strait in Eastern Asia
Source: MDPI journal article supplement (doi:10.3390/insects15050321), 2024-05-01
Supplement: s1 [file s1]

# Abundance and Seasonal Migration Patterns of Green Lacewings (Neuroptera: Chrysopidae) across the Bohai Strait in Eastern Asia

Xingya Wang <sup>1</sup>, Haotian Ma <sup>1</sup>, Yuechao Zhao <sup>1</sup>, Ying Gao <sup>1</sup> and Kongming Wu <sup>2,\*</sup>

<sup>1</sup> College of Plant Protection, Shenyang Agricultural University, Shenyang 110866, China; wangxingya20081@163.com (X.W.); mhtpony@163.com (H.M.); zhaoyuechao98512@163.com (Y.Z.); gy434585296@163.com (Y.G.)

<sup>2</sup> State Key Laboratory for Biology of Plant Diseases and Insect Pests, Institute of Plant Protection, Chinese Academy of Agricultural Sciences, Beijing 100193, China

\* Correspondence: wukongming@caas.cn

## Supporting Information

### Figure Legends

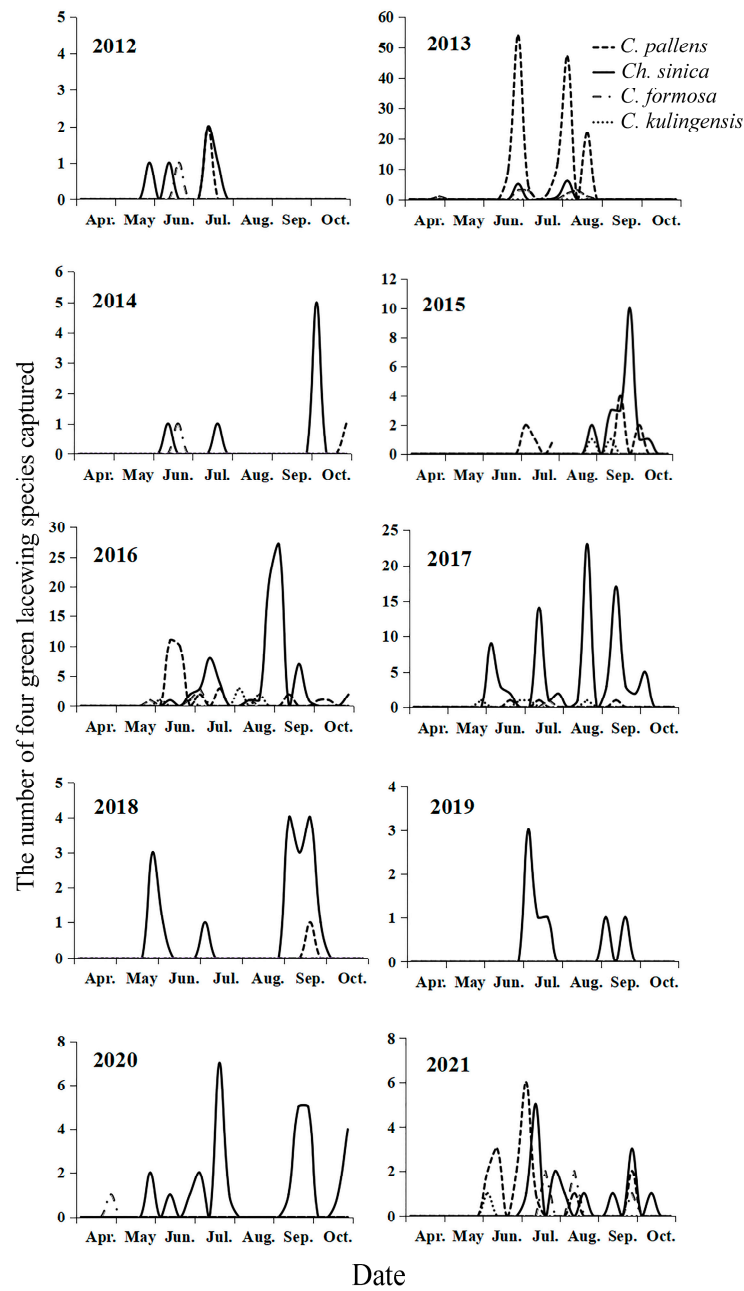

**Supplementary Figure S1.** Population dynamics of four species of green lacewings

by the suction trap during 2012-2021.

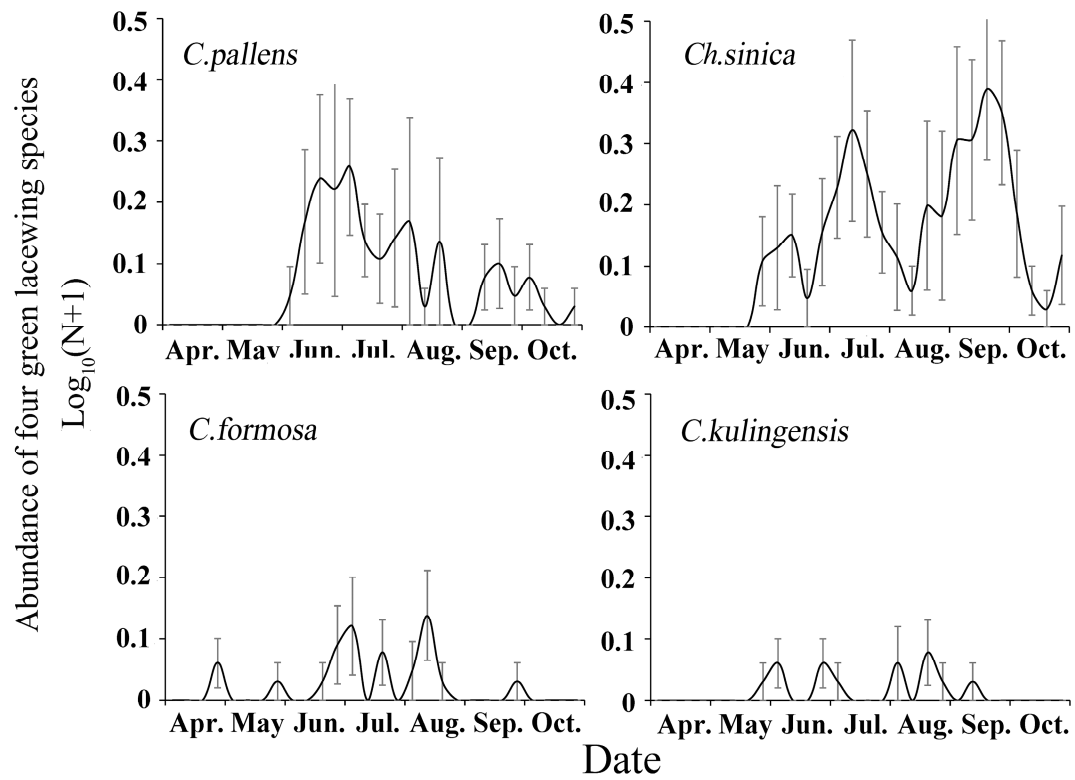

**Supplementary Figure S2.** Monthly average of four green lacewings captured by the suction trap during 2012-2021.

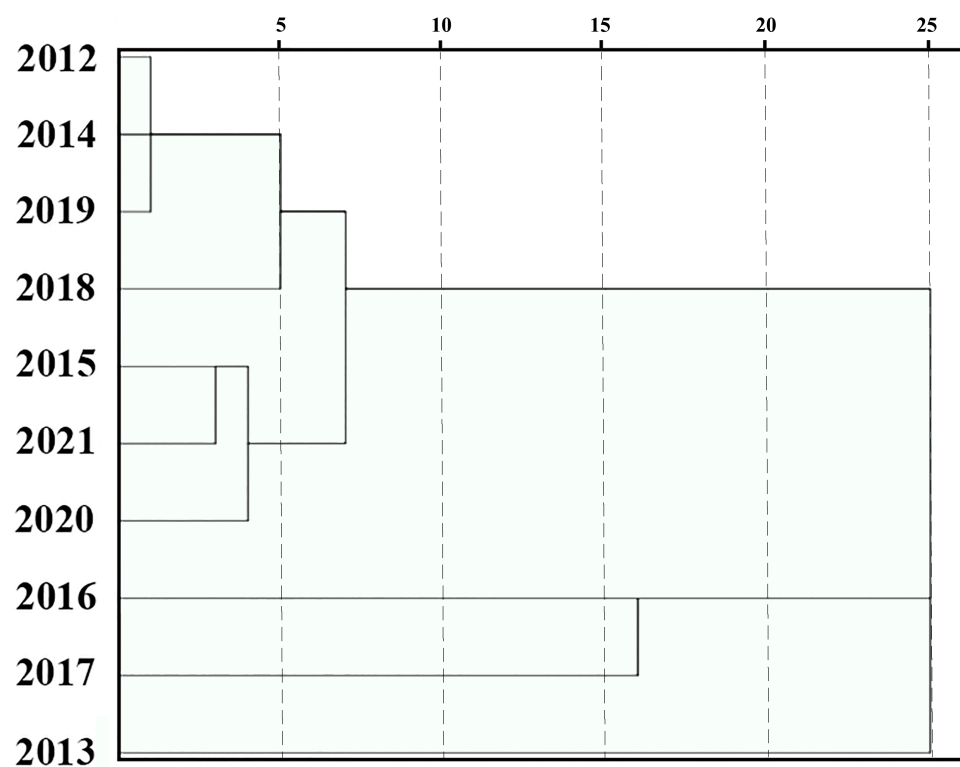

**Supplementary Figure S3.** Clustering dendrogram of the lacewings captured by the suction trap during 2012-2021.

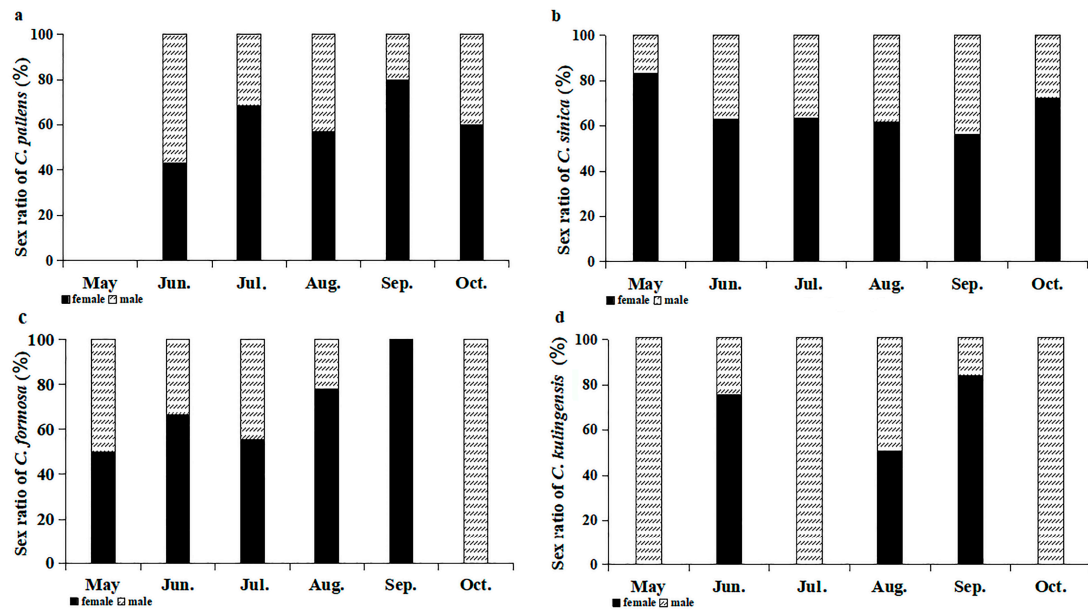

**Supplementary Figure S4.** Seasonal variation in the sex ratio of (a) *Chrysopa pallens*, (b) *Chrysoperla sinica*, (c) *Chrysopa formosa*, and (d) *Chrysopa kulingensis* females captured by the suction trap during 2012-2021.

**Supplementary Table S1.** The explained variation in meteorological factors and results of significance tests of four lacewing species on Beihuang Island during 2012-2021.

| Meteorology factors    | Year | Variance Explains (%) | Meteorological<br>factors contribution rate (%) | Pseudo- <i>F</i> | <i>P</i> |
|------------------------|------|-----------------------|-------------------------------------------------|------------------|----------|
| Average daily humidity | 2012 | 0.5                   | 8.8                                             | 0.1              | 0.954    |
|                        | 2013 | 1.2                   | 5.4                                             | 0.3              | 0.708    |
|                        | 2014 | 2.3                   | 8.2                                             | 0.4              | 0.548    |
|                        | 2015 | 1.5                   | 14.8                                            | 0.4              | 0.562    |
|                        | 2016 | 2.7                   | 11.4                                            | 0.9              | 0.442    |
|                        | 2017 | 4.1                   | 21.9                                            | 0.6              | 0.634    |
|                        | 2018 | 0.7                   | 21.3                                            | 0.2              | 0.678    |
|                        | 2019 | 3.0                   | 30.5                                            | 0.7              | 0.420    |
|                        | 2020 | 0.5                   | 6.1                                             | 0.1              | 0.752    |

|                          |      |      |      |     |       |
|--------------------------|------|------|------|-----|-------|
|                          | 2021 | 6.3  | 41.0 | 1.6 | 0.212 |
|                          | 2012 | 1.7  | 29.3 | 0.4 | 0.666 |
|                          | 2013 | 2.4  | 10.5 | 0.6 | 0.506 |
|                          | 2014 | 5.5  | 20.0 | 1.1 | 0.380 |
|                          | 2015 | 0.9  | 8.7  | 0.2 | 0.662 |
| Average daily wind speed | 2016 | 2.1  | 9.0  | 0.7 | 0.494 |
|                          | 2017 | 5.8  | 30.8 | 0.9 | 0.460 |
|                          | 2018 | 0.4  | 13.4 | 0.1 | 0.800 |
|                          | 2019 | 0.7  | 6.9  | 0.2 | 0.880 |
|                          | 2020 | 5.3  | 69.2 | 1.4 | 0.260 |
|                          | 2021 | 1.3  | 8.3  | 0.3 | 0.776 |
|                          | 2012 | 1.6  | 26.8 | 0.4 | 0.700 |
|                          | 2013 | 10.2 | 45.6 | 2.6 | 0.092 |

|                           |      |      |      |     |        |
|---------------------------|------|------|------|-----|--------|
| Average daily temperature | 2014 | 16.9 | 61.6 | 3.5 | 0.086  |
|                           | 2015 | 5.4  | 52.5 | 1.4 | 0.238  |
|                           | 2016 | 13.5 | 56.6 | 4.4 | 0.016* |
|                           | 2017 | 6.4  | 34.3 | 1.0 | 0.430  |
|                           | 2018 | 1.8  | 53.2 | 0.4 | 0.534  |
|                           | 2019 | 3.1  | 31.5 | 0.8 | 0.416  |
|                           | 2020 | 0.4  | 5.6  | 0.1 | 0.768  |
|                           | 2021 | 5.6  | 36.2 | 1.4 | 0.256  |
|                           | 2012 | 2    | 35.1 | 0.5 | 0.560  |
|                           | 2013 | 8.6  | 38.5 | 2.1 | 0.092  |
| Average daily rainfall    | 2014 | 2.8  | 10.2 | 0.6 | 0.478  |
|                           | 2015 | 2.5  | 24.0 | 0.7 | 0.438  |
|                           | 2016 | 5.5  | 23.0 | 1.8 | 0.168  |
|                           |      |      |      |     |        |



|      |     |      |     |       |
|------|-----|------|-----|-------|
| 2017 | 2.4 | 13.0 | 0.3 | 0.770 |
| 2018 | 0.4 | 12.1 | 0.1 | 0.792 |
| 2019 | 3.1 | 31.2 | 0.8 | 0.362 |
| 2020 | 0.5 | 6.1  | 0.1 | 0.752 |
| 2021 | 2.2 | 14.5 | 0.5 | 0.622 |
